# Supplementary material for: Facile synthesis of well-defined redox responsive diselenide-labeled polymers via organoselenium-mediated CRP and aminolysis
Source: Royal Society of Chemistry journal article supplement (doi:10.1039/c4py01481b), 2014-11-19
Supplement: c4py01481b1.pdf [file c4py01481b1.pdf]

## Supporting Information for

# Facile Synthesis of Well-Defined Redox Responsive Diselenide-Labeled Polymers via Organoselenium-Mediated CRP and Aminolysis

Feng Gao, Xiangqiang Pan\*, Jian Zhu, Zhengbiao Zhang\*, Wei Zhang, Xiulin Zhu

Suzhou Key Laboratory of Macromolecular Design and Precision Synthesis, Jiangsu Key Laboratory of Advanced Functional Polymer Design and Application, Department of Polymer Science and Engineering, College of Chemistry, Chemical Engineering and Materials Science, Soochow University, Suzhou 215123, China.

\*To whom correspondence should be addressed. E-mail:

[zhangzhengbiao@suda.edu.cn](mailto:zhangzhengbiao@suda.edu.cn) and [panxq@suda.edu.cn](mailto:panxq@suda.edu.cn).

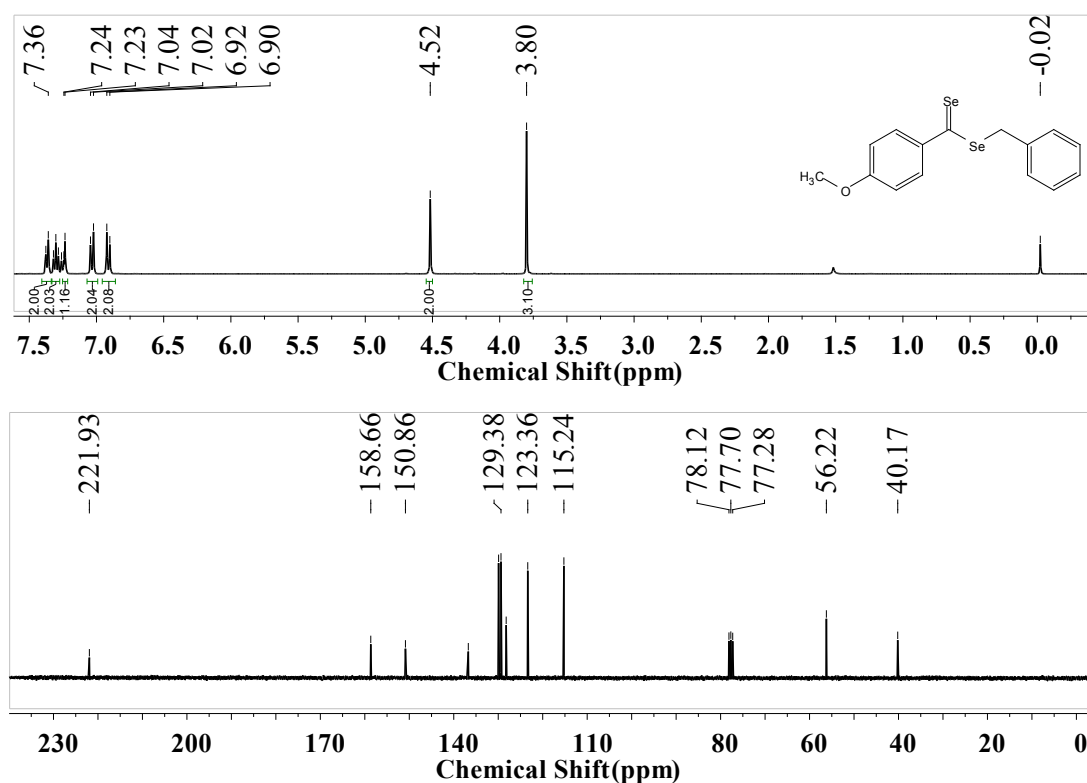

**Fig. S1** <sup>1</sup>H and <sup>13</sup>C NMR spectra of diselenocarbonate (Se-1) in CDCl<sub>3</sub> at room temperature.

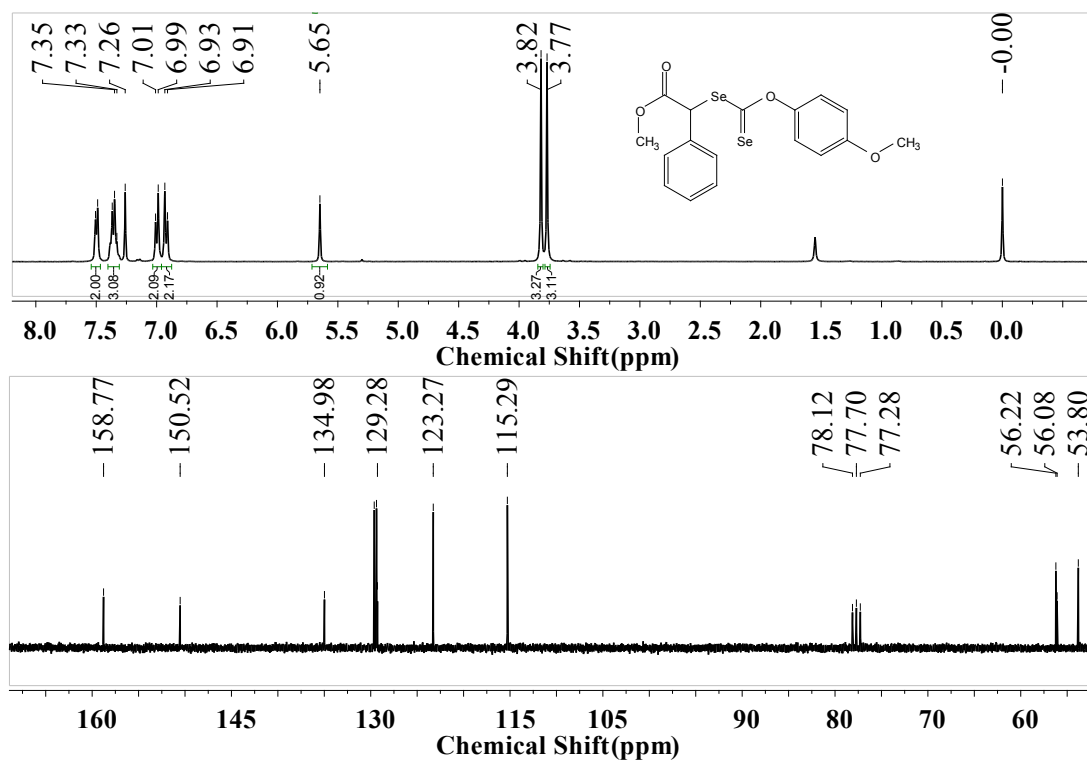

**Fig. S2** <sup>1</sup>H and <sup>13</sup>C NMR spectra for diselenocarbonate (Se-2) in CDCl<sub>3</sub> at room temperature.

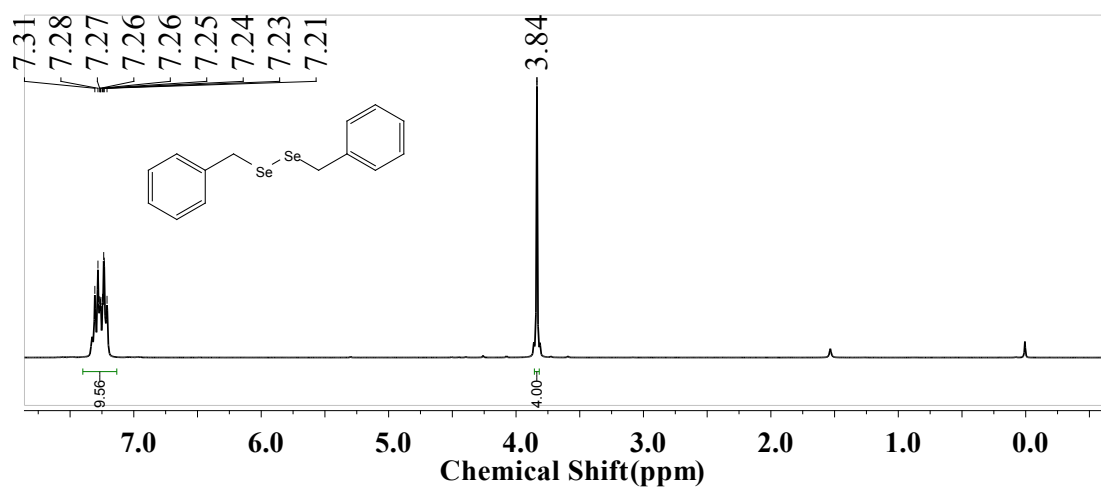

**Fig. S3** <sup>1</sup>H NMR spectrum of dibenzyldiselenide in CDCl<sub>3</sub> at room temperature.

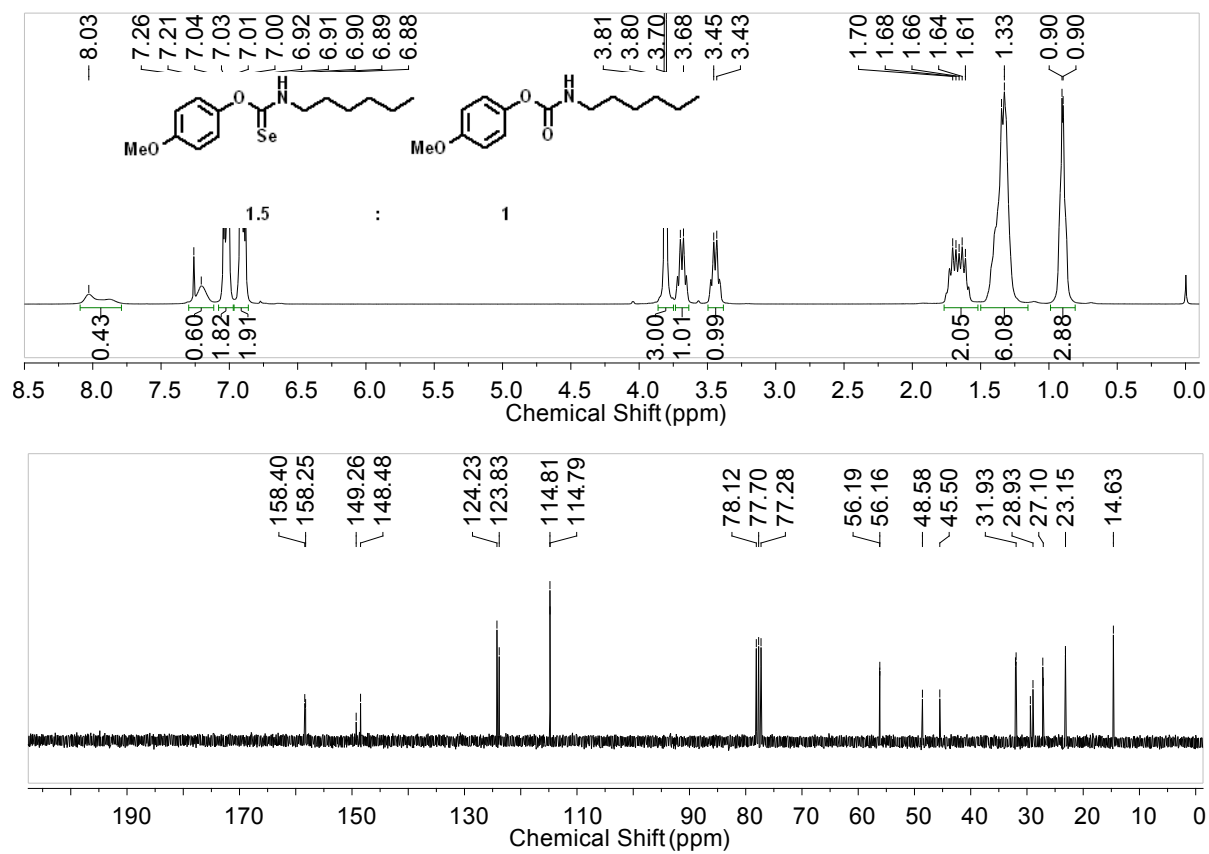

**Fig. S4**  $^1\text{H}$  and  $^{13}\text{C}$  NMR spectra for O-(4-methoxyphenyl) hexylcarbamoseleenoate in  $\text{CDCl}_3$  at room temperature.

|               |                      |             |        |                 |              |                        |                       |
|---------------|----------------------|-------------|--------|-----------------|--------------|------------------------|-----------------------|
| Sample Name   | pxq-gf-aminolysis    | Position    | Vial 1 | Instrument Name | Instrument 1 | User Name              |                       |
| Inj Vol       | 0                    | InjPosition |        | SampleType      | Sample       | IRM Calibration Status | Success               |
| Data Filename | pxq-gf-aminolysis-02 | ACQ Method  |        | Comment         |              | Acquired Time          | 11/14/2014 9:53:09 AM |

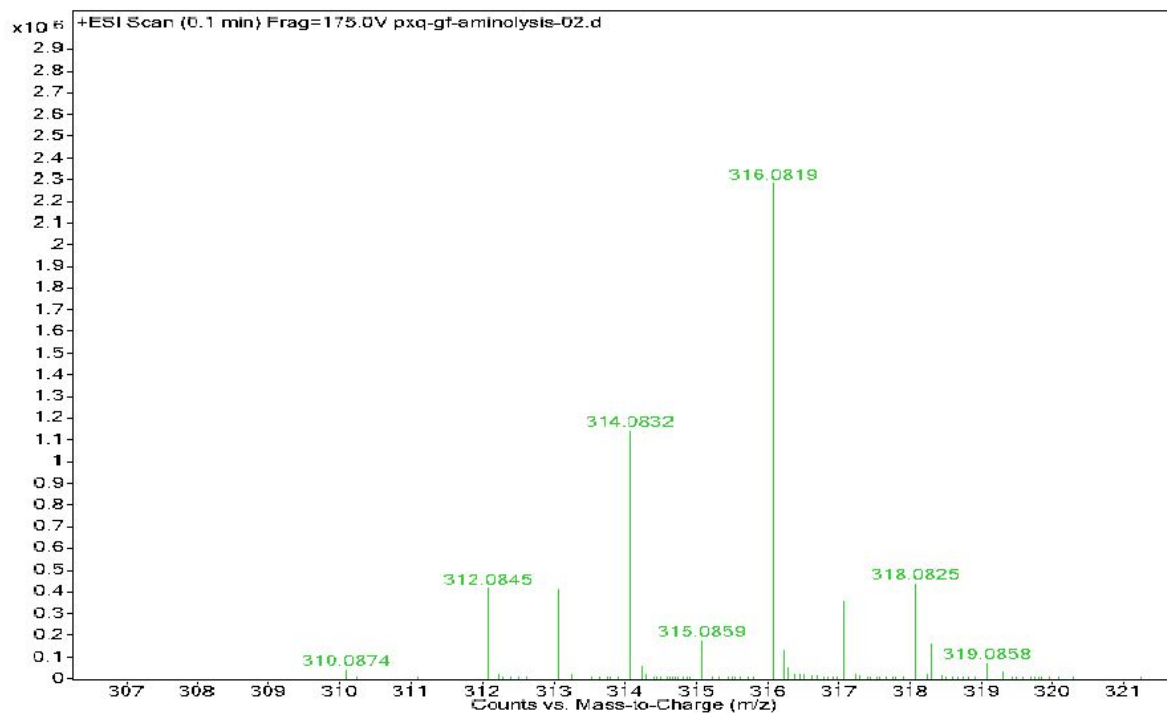

**Fig. S5** mass spectra for O-(4-methoxyphenyl) hexylcarbamoseleolate, LCMS(ESI): calcd. for  $C_{14}H_{21}NO_2Se$  315.0738, found 316.0819 (+  $H^+$ ).

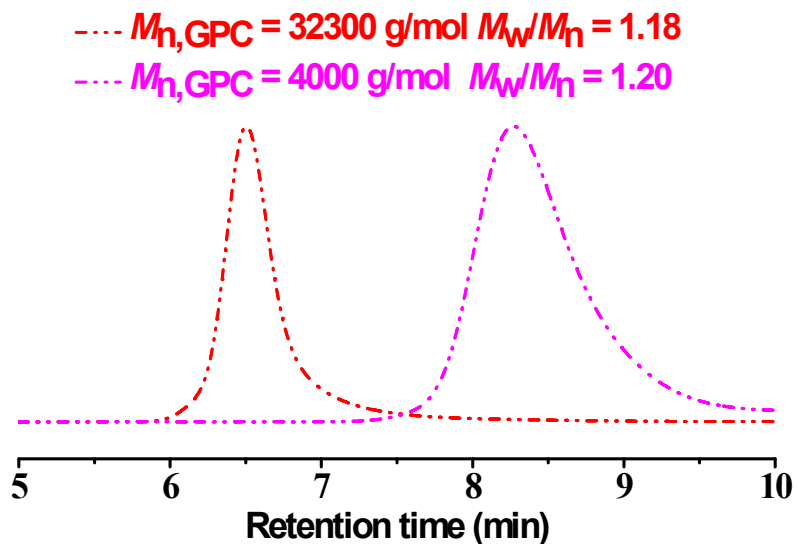

**Fig. S6** GPC curves of PS-Se ( $M_{n,GPC} = 4000$  g/mol,  $M_w/M_n = 1.20$ ) before and after chain extension ( $[St]_0:[PS-Se]_0:[AIBN]_0 = 500:1:0.5$ ,  $T = 60$  °C,  $t = 72$  h).

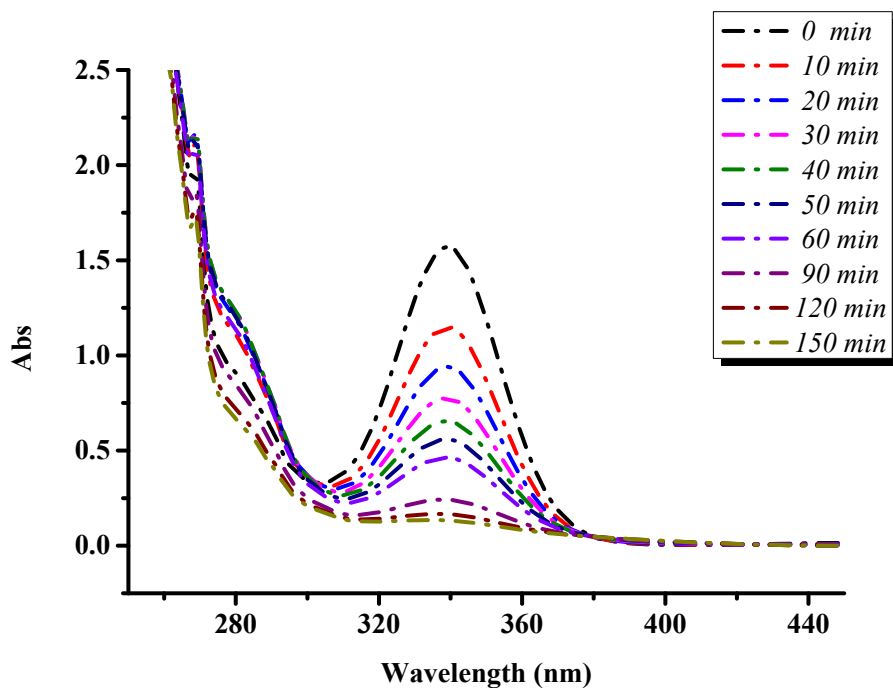

**Fig. S7** UV-Vis spectra of PS-Se ( $M_{n, \text{GPC}} = 4000$  g/mol,  $M_w/M_n = 1.20$ ,  $1 \times 10^{-4}$  M) aminolysis with hexylamine (5 eq.) at room temperature for 10 min, 20 min, 30 min, 40 min, 50 min, 60 min, 90 min, 120 min and 150 min.

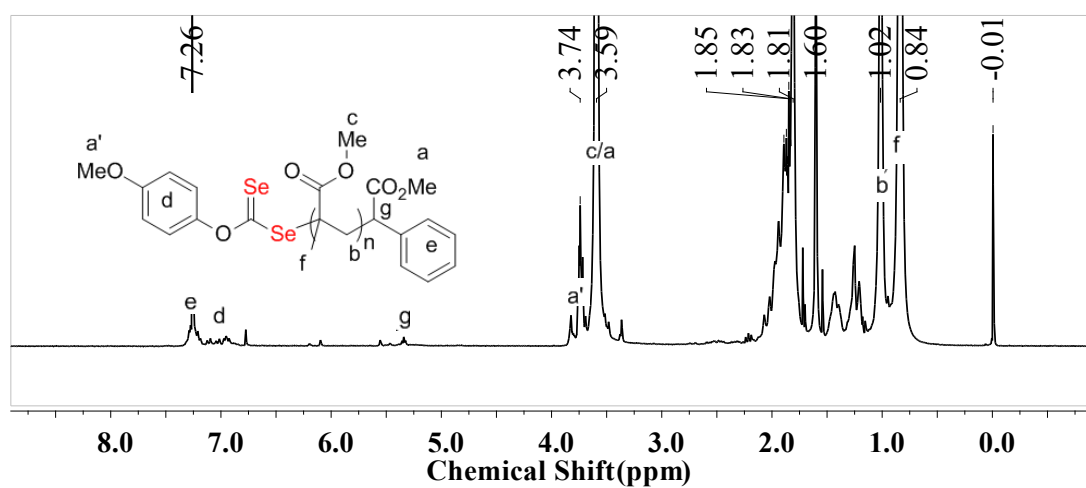

**Fig. S8**  $^1\text{H}$  NMR spectrum of PMMA-Se ( $M_{n, \text{GPC}} = 8100$  g/mol,  $M_w/M_n = 1.45$ ) in  $\text{CDCl}_3$  at room temperature.

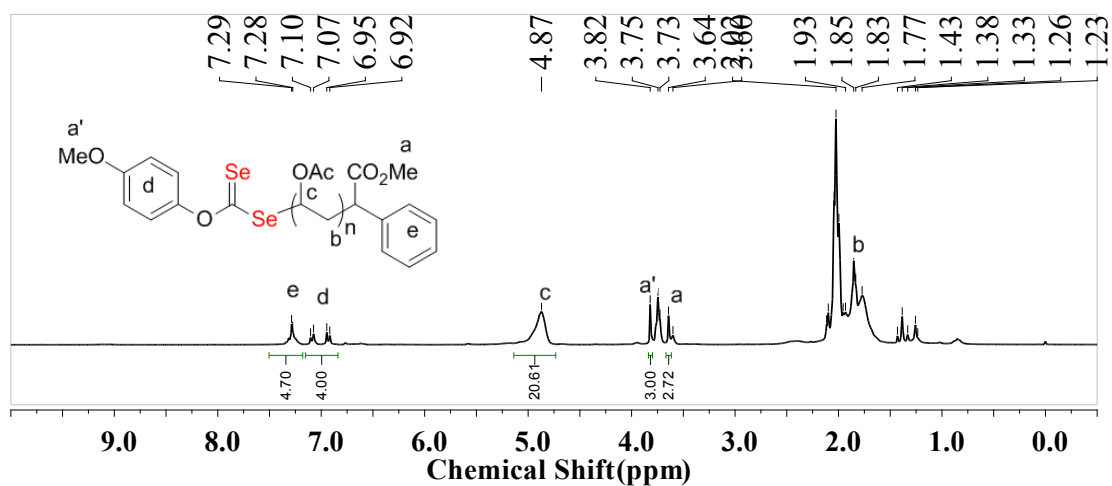

**Fig. S9**  $^1\text{H}$  NMR spectrum of PVAc-Se ( $M_{n,\text{GPC}} = 2500$  g/mol,  $M_w/M_n = 1.16$ ) in  $\text{CDCl}_3$  at room temperature.

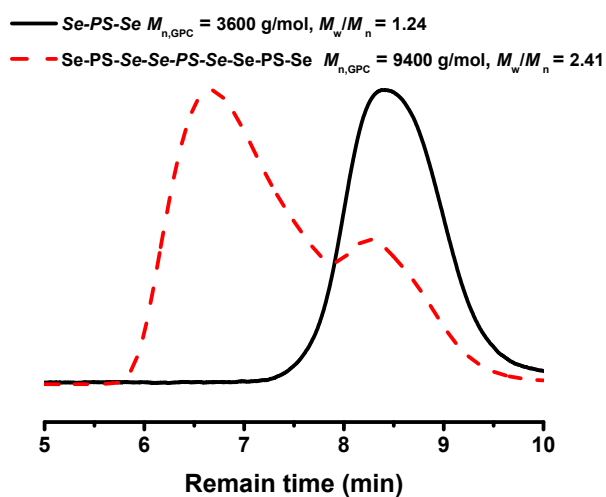

**Fig. S10** GPC curves of Se-PS-Se ( $M_{n,\text{GPC}} = 3600$  g/mol,  $M_w/M_n = 1.24$ ) before and after aminolysis with *n*-hexylamine (10 eqivmolar) at room temperature for 24 h.
